# Supplementary material for: A furoviral replicase recruits host HSP70 to membranes for viral RNA replication
Source: PubMed Central journal article supplement (PMC5377427; doi:10.1038/srep45590), 2017-04-03

# **A furoviral replicase recruits host HSP70 to membranes for viral RNA replication**

**Jian Yang**<sup>1</sup>, **Fen Zhang**<sup>1,2</sup>, **Nian-Jun Cai**<sup>1,2</sup>, **Ne Wu**<sup>1,3</sup>, **Xuan Chen**<sup>1,3</sup>, **Jing Li**<sup>1</sup>, **Xiang-Feng Meng**<sup>4</sup>, **Tong-Quan Zhu**<sup>4</sup>, **Jian-Ping Chen**<sup>1,\*</sup>, **Heng-Mu Zhang**<sup>1,2,\*</sup>

<sup>1</sup> State Key Laboratory Breeding Base for Zhejiang Sustain Pest and Disease Control; MOA and Zhejiang Key Laboratory of Plant Protection and Biotechnology, Institute of Virology and Biotechnology, Zhejiang Academy of Agricultural Sciences, Hangzhou 310021, China

<sup>2</sup>College of Chemistry and Life Science, Zhejiang Normal University, Jinhua 321004, China;

<sup>3</sup> Zhejiang Agriculture and Forest University, Linan 311300, China

<sup>4</sup> Zhumadian Academy of Agriculture Sciences, Zhumadian 463000, China

\* Corresponding authors, E-mail: [zhengmu@tsinghua.org.cn](mailto:zhengmu@tsinghua.org.cn); [jpchen2001@126.com](mailto:jpchen2001@126.com)

**Running title:** A furoviral replicase recruits HSP70 to membranes for replication

## Supplementary materials

### Supplementary Table

#### Table S1 Primers used in this study.

### Supplementary Figures

**Figure S1** Western blotting assays showing inhibition of NbHSP70 by quercetin treatment (A) and over-expression of TaHSP70 by Agrobacterium infiltration of 35S:TaHSP70 (B) in *N. benthamiana* plants.

**Figure S2** Sequence alignment of TaHSP70 and NbHSP70 showing that they are highly conserved.

**Figure S3** Recombinant expression of GST-tagged Rep<sup>1-333</sup> (GST-Rep<sup>1-333</sup>) and 6 x His-tagged TaHSP70 (His-TaHSP70) in *E. coli* BL21DE3 for ELISA-base binding assays. M, protein Marker; Lane 1, Protein sample extracted from *E. coli* BL21DE3 expressing GST-Rep<sup>1-333</sup>; Lane 2, Protein sample extracted from *E. coli* BL21DE3; Lane 3, Protein sample extracted from *E. coli* BL21DE3 expressing His-TaHSP70. White arrows point to the recombinant proteins GST-Rep<sup>1-333</sup> and His-TaHSP70, respectively.

**Table S1 Primers used in this study.**

| Primers                         | Sequences (5'-3')                 | Restriction sites<br>( <u>underlined</u> ) | The purpose of the primers              |
|---------------------------------|-----------------------------------|--------------------------------------------|-----------------------------------------|
| Nb70F                           | CTAGTCTAGATATGCATACAACATGAGG      | XbaI                                       | Vector TRV:HSP70                        |
| Nb70R                           | CGGGGTACCTTAGTCGACCTCCTCAAT       | KpnI                                       |                                         |
| BDTa70N                         | GGAATTCCATATGATGGCCAAGGGCGAGGGG   | NdeI                                       | Bait plasmid BD-TaHSP70                 |
| BDTa70C                         | CGCGGATCCGTCACCTCC TCGATCTT       | BamHI                                      |                                         |
| BDNb70N                         | GGAATTCCATATGATGGCAGGAAAAGGTGAA   | NdeI                                       | Bait plasmid BD-NbHSP70                 |
| BDNb70C                         | CGCGGATCCGTCGACCTCC TCAATCTT      | BamHI                                      |                                         |
| ADRep <sup>1-670</sup> N        | TCCCCACCCGGGATGCCGATCGATAGCAGT    | XmaI                                       | Prey plasmid AD- Rep <sup>1-670</sup>   |
| ADRep <sup>1-670</sup> C        | CGCGGATCCTCCTTTCATTACATGGAC       | BamHI                                      |                                         |
| ADRep <sup>670-1430</sup> N     | TCCCCACCCGGGAGGAGAAATACTTCTGAT    | XmaI                                       | Prey plasmid ADRep <sup>670-1430</sup>  |
| ADRep <sup>670-1430</sup> C     | CGCGGATCCCAAACCCCGCTGTCTTG        | BamHI                                      |                                         |
| ADRep <sup>1430-1858</sup> N    | TCCCCACCCGGGTTGGTACCGGTGATGCGG    | XmaI                                       | Prey plasmid ADRep <sup>1430-1858</sup> |
| ADRep <sup>1430-1858</sup> C    | CGCGGATCCCCATTCAAAGTTCCTATC       | BamHI                                      |                                         |
| ADRep <sup>1-167</sup> N        | TCCCCACCCGGGATGCCGATCGATAGCAGT    | XmaI                                       | Prey plasmid ADRep <sup>1-167</sup>     |
| ADRep <sup>1-167</sup> C        | CGCGGATCCTGGGTATCTCGTCCTTCTC      | BamHI                                      |                                         |
| ADRep <sup>167-333</sup> N      | TCCCCACCCGGGCCACCGAAGTCGGTGAA     | XmaI                                       | Prey plasmid ADRep <sup>167-333</sup>   |
| ADRep <sup>167-333</sup> C      | CGCGGATCCCGTCCGTCATTGTGAAGAA      | BamHI                                      |                                         |
| ADRep <sup>333-670</sup> N      | TCCCCACCCGGGACGCAACGGAAGCGAGG     | XmaI                                       | Prey plasmid ADRep <sup>333-670</sup>   |
| ADRep <sup>333-670</sup> C      | CGCGGATCCCTTCATTACATGGACCAT       | BamHI                                      |                                         |
| pETNb70N                        | CGCGGATCCATGGCAGGAAAAGGTGAA       | BamHI                                      | Plasmid pET28(a)-Nb70                   |
| pETNb70C                        | ATTTGCGGCCGCAGTCGACCTCCTCAATCTT   | NotI                                       |                                         |
| pETTA70N                        | CGCGGATCCATGGCCAAGGGCGAGGGG       | BamHI                                      | Plasmid pET28(a)-Ta70                   |
| pETTA70C                        | ATTTGCGGCCGCAGTCCACCTC CTCGATCTT  | NotI                                       |                                         |
| p6PIRep <sup>1-670</sup> N      | CGCGGATCCATGCCGATCGATAGCAGT       | BamHI                                      | Plasmid pGEX-Rep <sup>1-670</sup>       |
| p6PIRep <sup>1-670</sup> C      | CCGGAATCTTAAATTTCTCCTTTCATTAC     | EcoRI                                      |                                         |
| Rep <sup>1-1350</sup> -GFPN     | AAAAAGCAGGCTCCATGCCGATCGATAGCAGT  |                                            | Plasmids Rep <sup>1-1350</sup> -GFP     |
| Rep <sup>1-1350</sup> -GFPC     | AGAAAGCTGGGTCTTTGTGCAATTCGGGACA   |                                            |                                         |
| Rep <sup>1-1350</sup> -mCherryN | AAAAAGCAGGCTCCATGCCGATCGATAGCAGT  |                                            | Plasmids Rep <sup>1-1350</sup> -mCherry |
| Rep <sup>1-1350</sup> -mCherryC | AGAAAGCTGGGTCTTTGTGCAATTCGGGACA   |                                            |                                         |
| Nb70-GFPN                       | AA AAAGCAGGCTCCATGGCAGGAAAAGGT    |                                            | Plasmids NbHSP70-GFP                    |
| Nb70-GFPC                       | AGAAAGCTGGGTCTGTCGACCTC CTCAATCTT |                                            |                                         |
| Ta70-GFPN                       | AA AAAGCAGGCTCCATGGCCAAGGGCGAG    |                                            | Plasmids TaHSP70-GFP                    |
| Ta70-GFPC                       | AGAAAGCTGGGTCTGTCGACCTC CTCGATCTT |                                            |                                         |
| attB1                           | ACAAGTTGTACAAAAAAGCAGGCTCC        |                                            | Gateway vector                          |
| attB2                           | ACCACTTGTACAAGAAAGCTGGGTC         |                                            |                                         |
| BRepF                           | CGCGGATCCATGCCGATCGATAGCAGT       | BamHI                                      | Plasmids pCV-nYFP-Rep <sup>1-670</sup>  |
| BRepR                           | CGAGCTCCCTTTCATTACATGGAC          | SacI                                       |                                         |
| BTa70F                          | CGCGGATCCATGGCCAAGGGCGAGGGG       | BamHI                                      | Plasmids pCV-cYFP-TaHSP70               |
| BTa70R                          | CGAGCTCGTCCACCTC CTCGATCTT        | SacI                                       |                                         |
| BNb70F                          | CGCGGATCCATGGCAGGAAAAGGTGAA       | BamHI                                      | Plasmids pCV-cYFP-NbHSP70               |
| BNb70R                          | ATTTGCGGCCGCAGTCGACCTCCTCAATCTT   | NotI                                       |                                         |

**Figure S1**

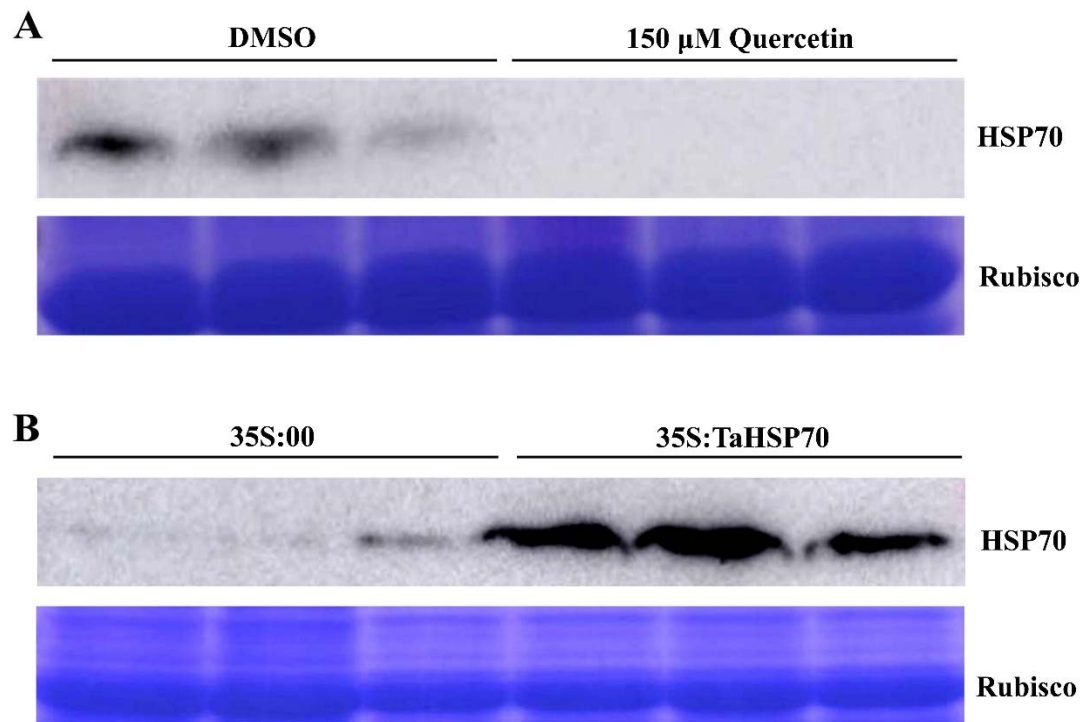

Figure S2

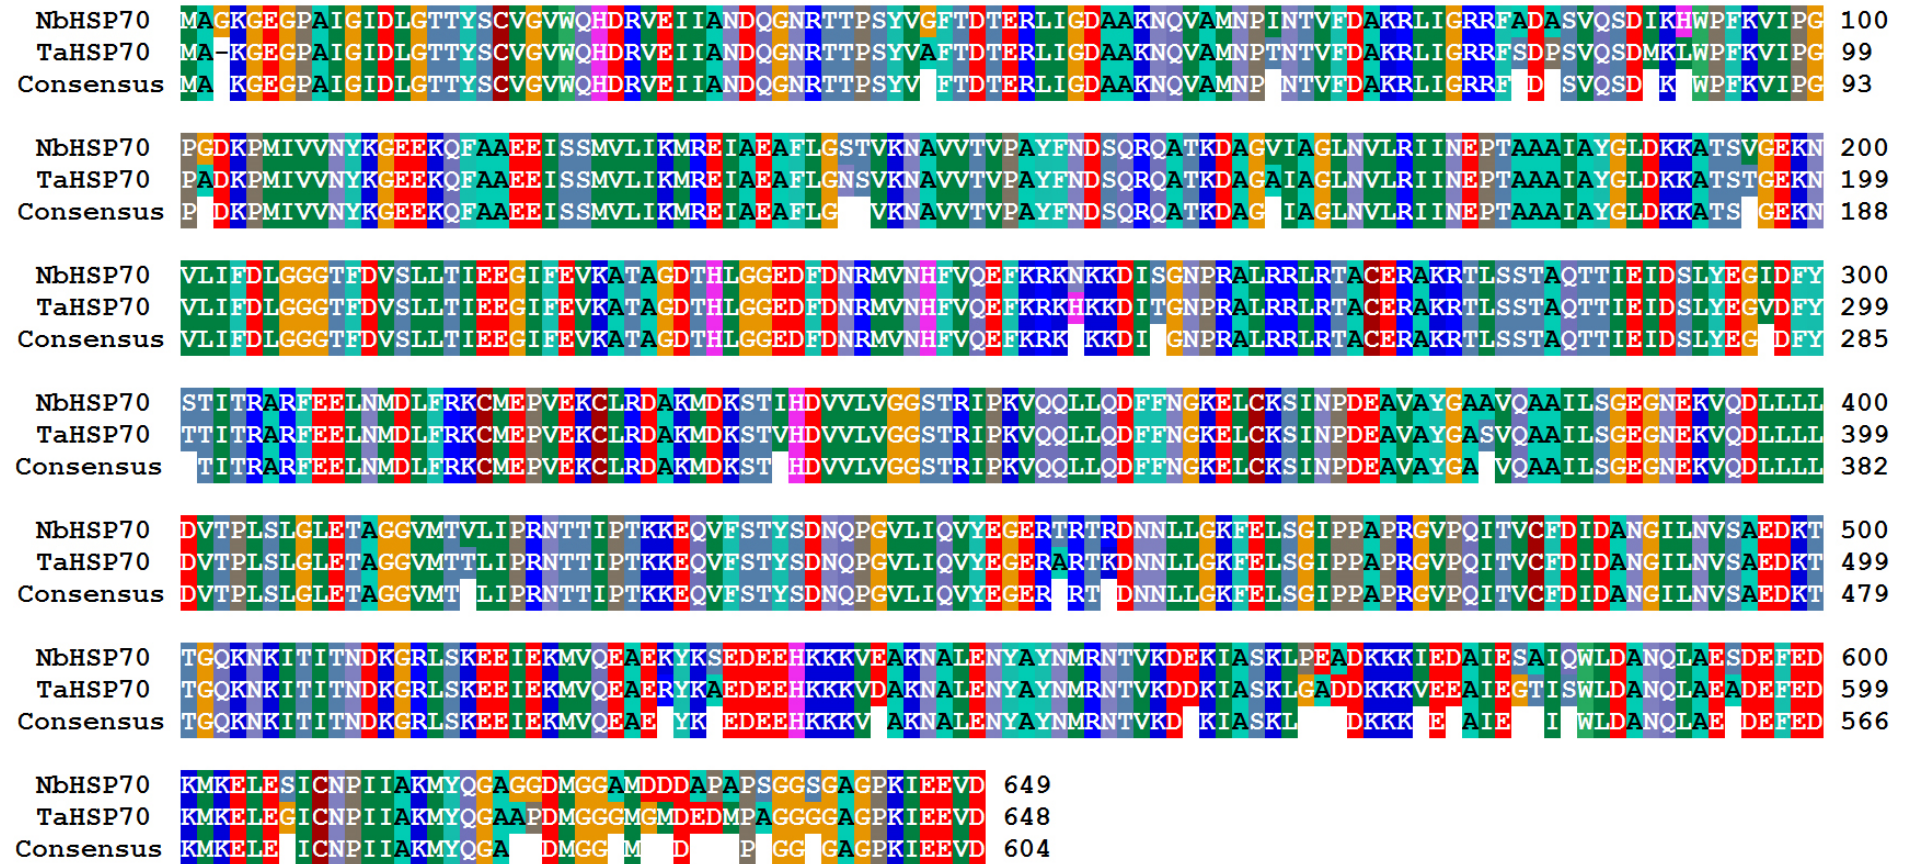

Figure S3

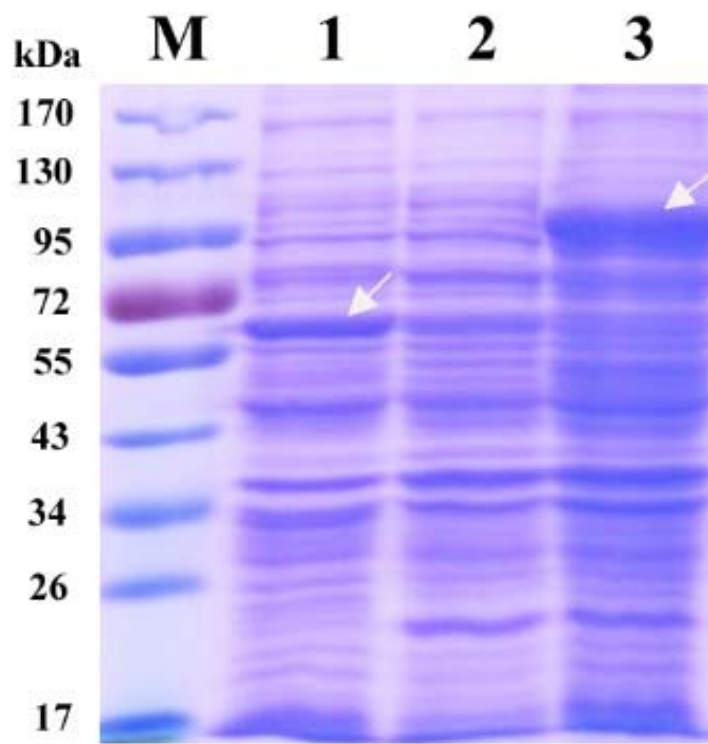

Supplement: srep45590-s1.pdf [file srep45590-s1.pdf]
